# Supplementary material
Source: PubMed Central journal article supplement (PMC2384116)
Supplement: NIHMS47590-supplement-01.pdf [file NIHMS47590-supplement-01.pdf]

a

Oregon R

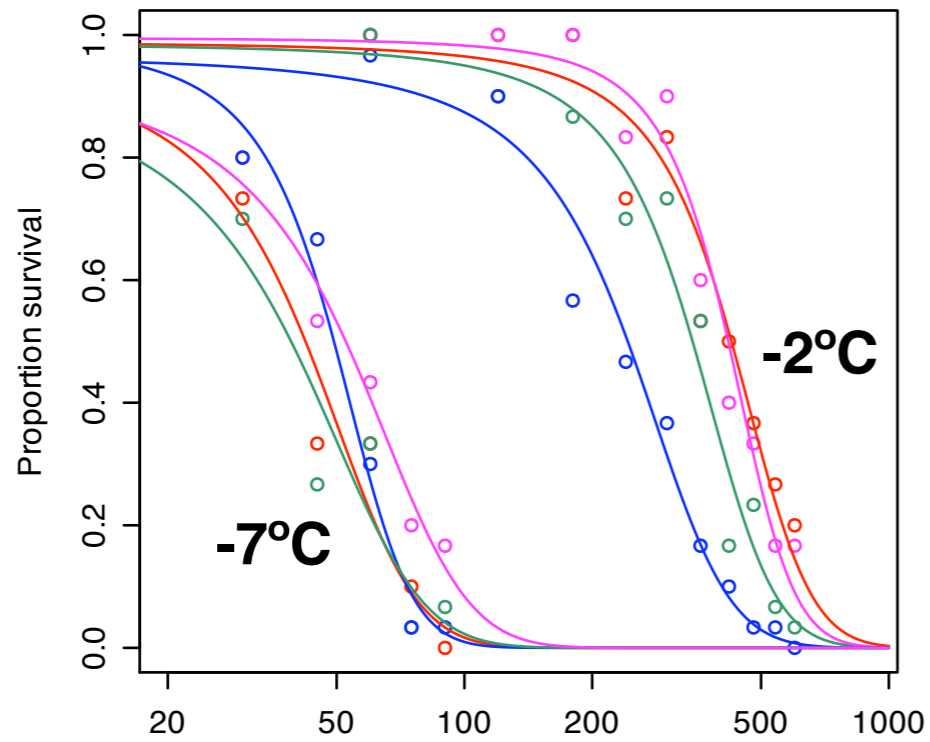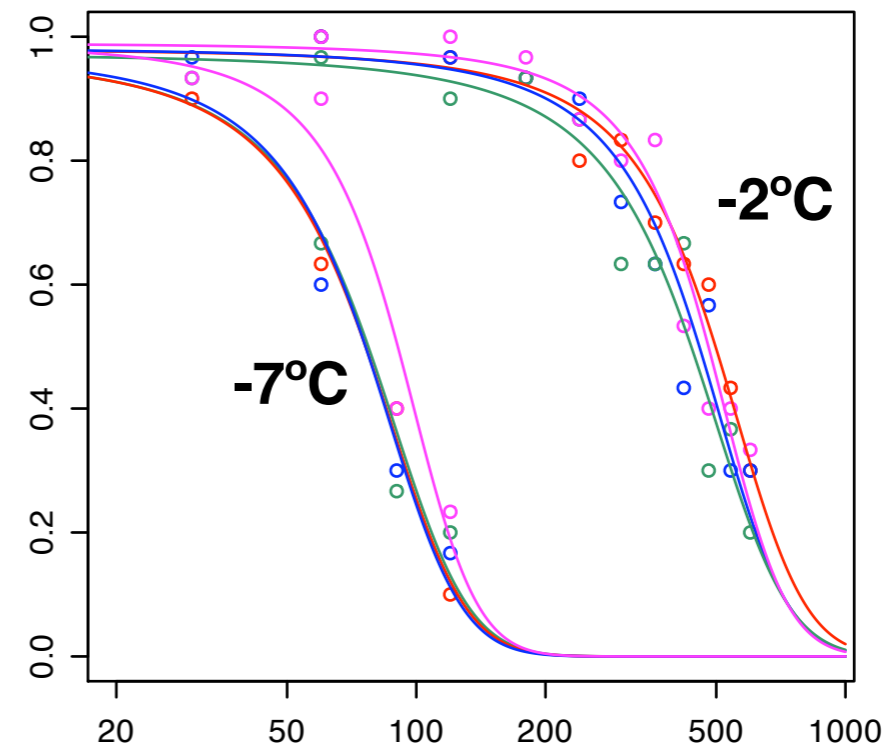

Berlin K

b

Stage I  
Stage II  
Stage III  
Stage W

c

Canton S

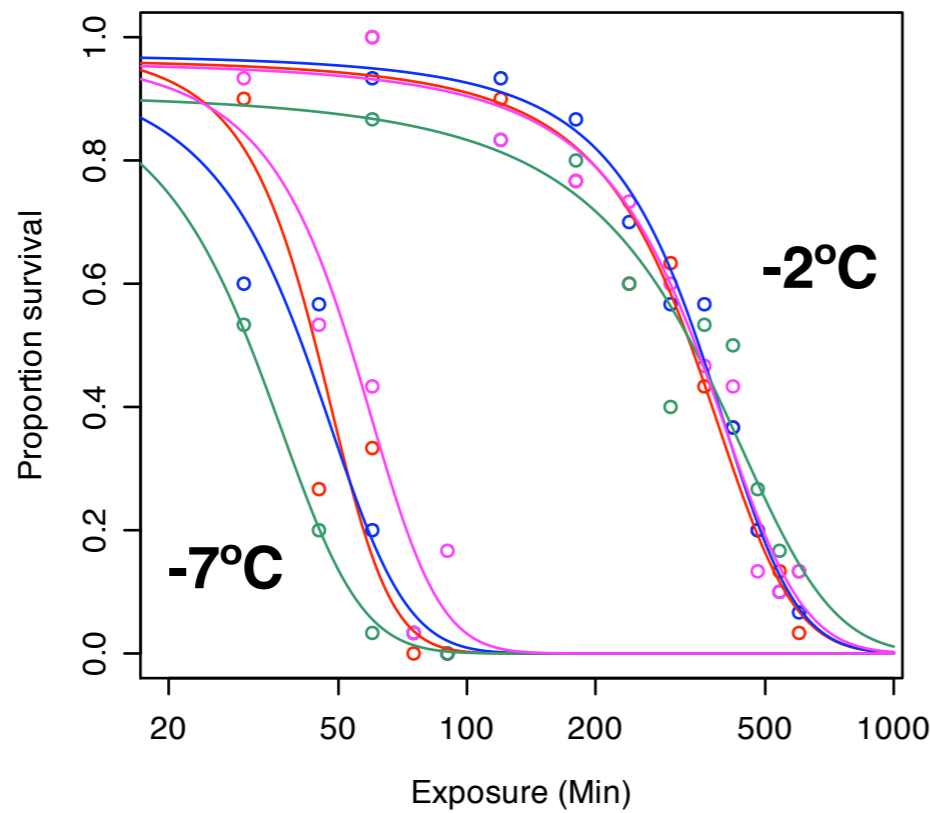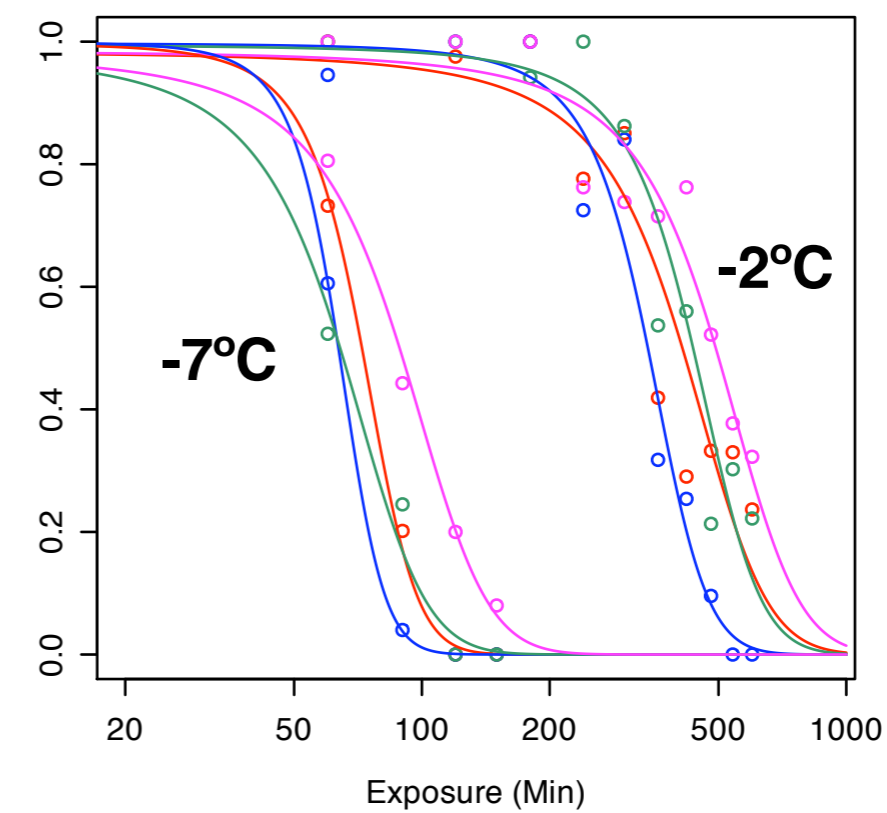

W5N

d

Basal cold tolerance in the larval instars of 4 strains of *D. melanogaster*. Upper right curves represent -2°C exposure & survival in 4 instars. The lower left represents -7°C tolerance in the various larval stages.

APPENDIX 1-1

**Acute cold tolerance data for four strains of *Drosophila melanogaster* and their 4 larval stages**

Cold tolerance of *Drosophila melanogaster* strain Oregon R larval stages after exposure to -7 °C for various time periods. Table contains the mean (top) and sd (bottom). The data is also presented as survival curves in appendix 1.

| Exposure (min) | Larval stage |          |          |          |
|----------------|--------------|----------|----------|----------|
|                | 1            | 2        | 3        | 4        |
| 30             | .7333333     | .8       | .7       | .8       |
|                | .1527525     | .1       | .2       | .2       |
| 45             | .3333333     | .6666667 | .2666667 | .5333333 |
|                | .4163332     | .2886751 | .057735  | .1527525 |
| 60             | .3333333     | .3       | .3333333 | .4333333 |
|                | .3511885     | .1       | .3055051 | .321455  |
| 75             | .1           | .0333333 | .0333333 | .2       |
|                | .1732051     | .057735  | .057735  | .1       |
| 90             | 0            | .0333333 | .0666667 | .1666667 |
|                | 0            | .057735  | .1154701 | .2886751 |
| 120            |              |          |          |          |
| 150            |              |          |          |          |

Cold tolerance of *Drosophila melanogaster* strain Canton S larval stages after exposure to -7 °C for various time periods. Table contains the mean (top) and sd (bottom). The data is also presented as survival curves in appendix 1.

| Exposure (min) | Larval stage |          |          |          |
|----------------|--------------|----------|----------|----------|
|                | 1            | 2        | 3        | 4        |
| 30             | .9           | .6       | .5333334 | .9333333 |
|                | .1           | .4582576 | .057735  | .057735  |
| 45             | .2666667     | .5666667 | .2       | .5333334 |
|                | .1527525     | .2081666 | 0        | .2081666 |
| 60             | .3333333     | .2       | .0333333 | .4333333 |
|                | .4932883     | .1       | .057735  | .057735  |
| 75             | 0            | .0333333 | .0333333 | .0333333 |
|                | 0            | .057735  | .057735  | .057735  |
| 90             | 0            | 0        | 0        | .1666667 |
|                | 0            | 0        | 0        | .2886751 |
| 120            |              |          |          |          |
| 150            |              |          |          |          |

Cold tolerance of *Drosophila melanogaster* strain Berlin K larval stages after exposure to -7 °C for various time periods. Table contains the mean (top) and sd (bottom). The data is also presented as survival curves in appendix 1.

| Exposure (min) | Larval stage        |                     |                      |                     |
|----------------|---------------------|---------------------|----------------------|---------------------|
|                | 1                   | 2                   | 3                    | 4                   |
| 30             | .9<br>0             | .9666666<br>.057735 | .9333333<br>.057735  | .9333333<br>.057735 |
| 45             |                     |                     |                      |                     |
| 60             | .6333333<br>.057735 | .6<br>.1            | .6666666<br>.2516611 | .9<br>.1            |
| 75             |                     |                     |                      |                     |
| 90             | .4<br>.1            | .3<br>0             | .2666667<br>.1527525 | .4<br>.1            |
| 120            | .1<br>.1            | .1666667<br>.057735 | .2<br>.1             | .2333333<br>.057735 |
| 150            |                     |                     |                      |                     |

Cold tolerance of *Drosophila melanogaster* strain W5N larval stages after exposure to -7 °C for various time periods. Table contains the mean (top) and sd (bottom). The data is also presented as survival curves in appendix 1.

| Exposure<br>(min) | Larval stage         |                      |                      |                      |
|-------------------|----------------------|----------------------|----------------------|----------------------|
|                   | 1                    | 2                    | 3                    | 4                    |
| 30                |                      |                      |                      |                      |
| 45                |                      |                      |                      |                      |
| 60                | 7.323333<br>.8200205 | 6.056667<br>.5814062 | 5.233333<br>.2516612 | 8.056666<br>.3728716 |
| 75                |                      |                      |                      |                      |
| 90                | 2.016667<br>.7751344 | .4<br>.3605551       | 2.45<br>.9836158     | 4.426667<br>1.967901 |
| 120               | 0<br>0               | 0<br>0               | 0<br>0               | 2<br>.7              |
| 150               | 0<br>0               | 0<br>0               | 0<br>0               | .8<br>.3605551       |

APPENDIX 1-2

**Chronic cold tolerance data for four strains of *Drosophila melanogaster* and their 4 larval stages**

Cold tolerance of *Drosophila melanogaster* strain Oregon R larval stages after exposure to -2 °C for various time periods. Table contains the mean (top) and sd (bottom). The data is also presented as survival curves in appendix 1.

| Exposure (min) | Larval stage         |                      |                      |                      |
|----------------|----------------------|----------------------|----------------------|----------------------|
|                | 1                    | 2                    | 3                    | 4                    |
| 0              | 1<br>0               | 1<br>0               | 1<br>0               | 1<br>0               |
| 60             | 1<br>0               | 1<br>0               | 1<br>0               | 1<br>0               |
| 120            | .6666667<br>.3444803 | .75<br>.1870829      | .5833333<br>.3188521 | .7833333<br>.2136976 |
| 240            | .7166667<br>.2562551 | .6333333<br>.2875181 | .5333334<br>.332666  | .6333333<br>.2804758 |
| 360            | .5<br>.3162278       | .6<br>.1414214       | .45<br>.3563706      | .3666667<br>.273252  |
| 480            | .45<br>.3209361      | .5<br>.363318        | .2666667<br>.233809  | .4166667<br>.271416  |
| 600            | .35<br>.3331666      | .5166667<br>.2857738 | .25<br>.2949576      | .45<br>.3082207      |
| 720            | .1833333<br>.147196  | .1333333<br>.136626  | .15<br>.1048809      | .25<br>.1048809      |
| 840            | .05<br>.083666       | .1<br>.0894427       | .0833333<br>.132916  | .1166667<br>.1169045 |
| 960            | .0166667<br>.0408248 | .05<br>.083666       | .0166667<br>.0408248 | .0166667<br>.0408248 |

Cold tolerance of *Drosophila melanogaster* strain Canton S larval stages after exposure to -2 °C for various time periods. Table contains the mean (top) and sd (bottom). The data is also presented as survival curves in appendix 1.

| Exposure<br>(min) | Larval stage         |                      |                      |                      |
|-------------------|----------------------|----------------------|----------------------|----------------------|
|                   | 1                    | 2                    | 3                    | 4                    |
| 0                 | 1<br>0               | 1<br>0               | 1<br>0               | 1<br>0               |
| 60                | 1<br>0               | 1<br>0               | 1<br>0               | 1<br>0               |
| 120               | .72<br>.2280351      | .45<br>.1870829      | .4<br>.2607681       | .65<br>.3331666      |
| 240               | .6333333<br>.301109  | .45<br>.2810694      | .4166667<br>.2562551 | .4666667<br>.242212  |
| 360               | .75<br>.2949576      | .2<br>.244949        | .25<br>.2167948      | .4166667<br>.3060501 |
| 480               | .4<br>.1414214       | .0833333<br>.1602082 | .1666667<br>.1861899 | .2666667<br>.1966384 |
| 600               | .3333333<br>.301109  | .15<br>.1048809      | .1333333<br>.175119  | .15<br>.1974842      |
| 720               | .15<br>.1974842      | .05<br>.083666       | .05<br>.083666       | .0833333<br>.1169045 |
| 840               | .35<br>.1870829      | .0166667<br>.0408248 | .0166667<br>.0408248 | .0333333<br>.0516398 |
| 960               | .2833333<br>.3656045 | .0166667<br>.0408248 | 0<br>0               | .05<br>.083666       |

Cold tolerance of *Drosophila melanogaster* strain Berlin K larval stages after exposure to -2 °C for various time periods. Table contains the mean (top) and sd (bottom). The data is also presented as survival curves in appendix 1.

| Exposure<br>(min) | Larval stage         |                      |                      |                      |
|-------------------|----------------------|----------------------|----------------------|----------------------|
|                   | 1                    | 2                    | 3                    | 4                    |
| 0                 | 1<br>0               | 1<br>0               | 1<br>0               | 1<br>0               |
| 60                | 1<br>0               | 1<br>0               | 1<br>0               | 1<br>0               |
| 120               | .8166667<br>.1722401 | .75<br>.250998       | .8166667<br>.1722401 | .8666667<br>.2065591 |
| 240               | .85<br>.1378405      | .7<br>.1788854       | .8666667<br>.175119  | .8333333<br>.1505545 |
| 360               | .9<br>.0894427       | .6<br>.3162278       | .65<br>.1760682      | .7166666<br>.2316607 |
| 480               | .6<br>.2366432       | .5166667<br>.2401388 | .5166667<br>.2316607 | .6<br>.2280351       |
| 600               | .5666667<br>.1032796 | .4666667<br>.301109  | .35<br>.083666       | .5666667<br>.2804758 |
| 720               | .4166667<br>.2786874 | .1<br>.1264911       | .0666667<br>.0816497 | .35<br>.2258318      |
| 840               | .5833333<br>.3600926 | .15<br>.1048809      | .1<br>.1264911       | .1166667<br>.1602082 |
| 960               | .25<br>.3781534      | .1333333<br>.1966384 | .0166667<br>.0408248 | .0833333<br>.1169045 |



Cold tolerance of *Drosophila melanogaster* strain W5N larval stages after exposure to -2 °C for various time periods. Table contains the mean (top) and sd (bottom). The data is also presented as survival curves in appendix 1.

| Exposure<br>(min) | Larval stage         |                      |                      |                      |
|-------------------|----------------------|----------------------|----------------------|----------------------|
|                   | 1                    | 2                    | 3                    | 4                    |
| 0                 | 1<br>0               | 1<br>0               | 1<br>0               | 1<br>0               |
| 60                | 1<br>0               | 1<br>0               | 1<br>0               | 1<br>0               |
| 120               | .8<br>.303315        | .85<br>.1870829      | .75<br>.2738613      | .8833333<br>.1602082 |
| 240               | .7333333<br>.233809  | .4166667<br>.4262237 | .6666667<br>.3011109 | .8333333<br>.2250926 |
| 360               | .8<br>.167332        | .4<br>.3521363       | .6<br>.3577709       | .6<br>.3405877       |
| 480               | .5333334<br>.2160247 | .4333333<br>.2875181 | .6<br>.2683281       | .45<br>.250998       |
| 600               | .4666667<br>.2065591 | .5166667<br>.3060501 | .35<br>.2738613      | .4<br>.2366432       |
| 720               | .3833333<br>.3371449 | .1666667<br>.0816497 | .15<br>.1224745      | .1333333<br>.2804758 |
| 840               | .5833333<br>.3311596 | .1166667<br>.147196  | .0833333<br>.1169045 | .1333333<br>.121106  |
| 960               | .1333333<br>.121106  | .0166667<br>.0408248 | .05<br>.083666       | 0<br>0               |

## APPENDIX 2

### Effects of RCH on acute and chronic cold tolerance in four larval stages in four different strains of *Drosophila melanogaster*

#### Effect of RCH on acute cold tolerance

##### Oregon R

| stage | Without RCH | -sd  | With RCH | +sd  |
|-------|-------------|------|----------|------|
| 1     | 0.1         | 0.1  | 0.33     | 0.29 |
| 2     | 0.03        | 0.06 | 0.13     | 0.06 |
| 3     | 0.1         | 0    | 0.4      | 0.2  |
| w     | 0.2         | 0.1  | 0.47     | 0.35 |

##### Berlin K

| stage | Without RCH | -sd  | With RCH | +sd  |
|-------|-------------|------|----------|------|
| 1     | 0.07        | 0.07 | 0.13     | 0.12 |
| 2     | 0.13        | 0.15 | 0.27     | 0.15 |
| 3     | 0.03        | 0.06 | 0.47     | 0.12 |
| w     | 0.03        | 0.06 | 0.47     | 0.35 |

##### Canton S

| stage | Without RCH | -sd  | With RCH | +sd  |
|-------|-------------|------|----------|------|
| 1     | 0.03        | 0.03 | 0.81     | 0.03 |
| 2     | 0.12        | 0.08 | 0.39     | 0.07 |
| 3     | 0.06        | 0.02 | 0.76     | 0.03 |
| w     | 0.35        | 0.13 | 0.59     | 0.08 |

##### W5N

| stage | Without RCH | -sd  | With RCH | +sd   |
|-------|-------------|------|----------|-------|
| 1     | 0.38        | 0.12 | 0.69     | 0.03  |
| 2     | 0.086       | 0.03 | 0.4      | 0.04  |
| 3     | 0.42        | 0.13 | 0.52     | 0.001 |
| w     | 0.72        | 0.23 | 0.88     | 0.05  |

## Effect of RCH on chronic cold tolerance

### Oregon R

| stage | Without RCH | -sd  | With RCH | +sd  |
|-------|-------------|------|----------|------|
| 1     | 0.16        | 0.05 | 0.75     | 0.03 |
| 2     | 0.1         | 0.04 | 0.13     | 0.08 |
| 3     | 0.35        | 0.09 | 0.81     | 0.13 |
| w     | 0.89        | 0.09 | 0.84     | 0.02 |

### Berlin K

| stage | Without RCH | -sd  | With RCH | +sd  |
|-------|-------------|------|----------|------|
| 1     | 0.03        | 0.01 | 0.4      | 0.1  |
| 2     | 0.33        | 0.28 | 0.13     | 0.15 |
| 3     | 0.03        | 0.01 | 0.27     | 0.12 |
| w     | 0.03        | 0.01 | 0.37     | 0.06 |

### Canton S

| stage | Without RCH | -sd  | With RCH | +sd  |
|-------|-------------|------|----------|------|
| 1     | 0.2         | 0.02 | 0.67     | 0.12 |
| 2     | 0.24        | 0.05 | 0.64     | 0.04 |
| 3     | 0.11        | 0.01 | 0.52     | 0.20 |
| w     | 0.08        | 0.02 | 0.37     | 0.09 |

### W5N

| stage | Without RCH | -sd   | With RCH | +sd  |
|-------|-------------|-------|----------|------|
| 1     | 0.04        | 0.01  | 0.44     | 0.03 |
| 2     | 0.01        | 0.002 | 0.34     | 0.08 |
| 3     | 0.04        | 0.01  | 0.50     | 0.13 |
| w     | 0.07        | 0.02  | 0.6      | 0.02 |

## APPENDIX 3

### Effect of heat shock on acute and chronic cold tolerance in four strains of the four larval stages of *Drosophila melanogaster*

#### Acute cold tolerance after heat shock

##### Oregon R

| stage | Without RCH | -sd   | With RCH | +sd  |
|-------|-------------|-------|----------|------|
| 1     | 0.1         | 0.052 | 0.07     | 0.03 |
| 2     | 0           | 0     | 0.09     | 0.02 |
| 3     | 0.16        | 0.03  | 0.24     | 0.07 |
| w     | 0.39        | 0.11  | 0.21     | 0.03 |

##### Canton S

| stage | Without RCH | -sd  | With RCH | +sd  |
|-------|-------------|------|----------|------|
| 1     | 0.15        | 0.05 | 0        | 0    |
| 2     | 0.13        | 0.05 | 0.07     | 0.02 |
| 3     | 0.18        | 0.05 | 0.19     | 0.09 |
| w     | 0.42        | 0.07 | 0.18     | 0.06 |

##### Berlin K

| stage | Without RCH | -sd  | With RCH | +sd  |
|-------|-------------|------|----------|------|
| 1     | 0.17        | 0.05 | 0.25     | 0.08 |
| 2     | 0.19        | 0.07 | 0.06     | 0.02 |
| 3     | 0.27        | 0.03 | 0.44     | 0.04 |
| w     | 0.19        | 0.04 | 0.78     | 0.09 |

##### W5N

| stage | Without RCH | -sd  | With RCH | +sd  |
|-------|-------------|------|----------|------|
| 1     | 0.08        | 0.03 | 0.2      | 0.06 |
| 2     | 0.07        | 0.02 | 0.15     | 0.04 |
| 3     | 0.13        | 0.1  | 0.26     | 0.09 |
| w     | 0.12        | 0.04 | 0.24     | 0.07 |

## Chronic cold tolerance after heat shock

### Oregon R

| stage | Without RCH | -sd   | With RCH | +sd  |
|-------|-------------|-------|----------|------|
| 1     | 0.09        | 0.04  | 0.08     | 0.03 |
| 2     | 0.02        | 0.01  | 0.01     | 0.01 |
| 3     | 0.1         | 0.03  | 0.07     | 0.03 |
| w     | 0.04        | 0.001 | 0.13     | 0.02 |

### Canton S

| stage | Without RCH | -sd  | With RCH | +sd  |
|-------|-------------|------|----------|------|
| 1     | 0.1         | 0.03 | 0.04     | 0.02 |
| 2     | 0.13        | 0.05 | 0.02     | 0.01 |
| 3     | 0.08        | 0.04 | 0.1      | 0.03 |
| w     | 0.07        | 0.01 | 0.06     | 0.05 |

### Berlin K

| stage | Without RCH | -sd  | With RCH | +sd  |
|-------|-------------|------|----------|------|
| 1     | 0.14        | 0.08 | 0.07     | 0.03 |
| 2     | 0.23        | 0.02 | 0.06     | 0.02 |
| 3     | 0.17        | 0.04 | 0.09     | 0.03 |
| w     | 0.2         | 0.09 | 0.12     | 0.02 |

### W5N

| stage | Without RCH | -sd  | With RCH | +sd  |
|-------|-------------|------|----------|------|
| 1     | 0.08        | 0.01 | 0.09     | 0.02 |
| 2     | 0.15        | 0.08 | 0        | 0    |
| 3     | 0.12        | 0.13 | 0.22     | 0.05 |
| w     | 0.04        | 0.02 | 0.19     | 0.08 |

APPENDIX 4

Effect of combined RCH and heat shock on acute and chronic cold tolerance in *Drosophila melanogaster* larval stages

Oregon R: Effect of RCH, HS, and combination pretreatments on acute and chronic cold exposure

| Stage | Oregon R Acute |      | Oregon R Chronic |      |
|-------|----------------|------|------------------|------|
|       | Control        | sd   | Control          | sd   |
| 1     | 0.23           | 0.08 | 0.1              | 0.03 |
| 2     | 0              | 0    | 0.16             | 0.03 |
| 3     | 0.25           | 0.05 | 0.08             | 0.01 |
| w     | 0.20           | 0.06 | 0.06             | 0.01 |

  

| Stage | RCH  |      | RCH  |      |
|-------|------|------|------|------|
|       | RCH  | sd   | RCH  | sd   |
| 1     | 0.34 | 0    | 0.19 | 0.03 |
| 2     | 0.29 | 0    | 0.19 | 0.09 |
| 3     | 0.12 | 0.02 | 0.03 | 0.03 |
| w     | 0.3  | 0.01 | 0.01 | 0.06 |

  

| Stage | HS   |      | HS   |      |
|-------|------|------|------|------|
|       | HS   | sd   | HS   | sd   |
| 1     | 1    | 0    | 0.16 | 0.06 |
| 2     | 1    | 0    | 0.22 | 0.04 |
| 3     | 0.43 | 0.15 | 0.06 | 0.05 |
| w     | 1    | 0    | 0.01 | 0.01 |

  

| Stage | RCH+HS |      | RCH+HS |      |
|-------|--------|------|--------|------|
|       | RCH+HS | sd   | RCH+HS | sd   |
| 1     | 0.57   | 0.06 | 0.02   | 0.03 |
| 2     | 0.57   | 0.09 | 0.06   | 0.06 |
| 3     | 0.67   | 0.17 | 0      | 0    |
| w     | 0.42   | 0.07 | 0.01   | 0.01 |

  

| Stage | HS+RCH |      | HS+RCH |      |
|-------|--------|------|--------|------|
|       | HS+RCH | sd   | HS+RCH | sd   |
| 1     | 1      | 0    | 0.37   | 0.08 |
| 2     | 0.62   | 0.12 | 0.52   | 0.1  |
| 3     | 0.75   | 0.19 | 0.13   | 0.05 |
| w     | 0.81   | 0.05 | 0.10   | 0.1  |

**Berlin K: Effect of RCH, HS, and combination pretreatments on acute and chronic cold exposure**

| Berlin K Acute |         |      | Berlin K Chronic |    |
|----------------|---------|------|------------------|----|
| Stage          | Control | sd   | Control          | sd |
| 1              | 0.07    | 0.03 | 0                | 0  |
| 2              | 0.08    | 0.02 | 0                | 0  |
| 3              | 0.01    | 0.05 | 0.1              | 0  |
| w              | 0.01    | 0.04 | 0                | 0  |

  

|   | RCH  | sd   | RCH | sd   |
|---|------|------|-----|------|
| 1 | 0.23 | 0.1  | 0.1 | 0.1  |
| 2 | 0.07 | 0.02 | 0   | 0    |
| 3 | 0.43 | 0.13 | 0   | 0    |
| w | 0.17 | 0.08 | 0.1 | 0.06 |

  

|   | HS   | sd   | HS | sd |
|---|------|------|----|----|
| 1 | 0.09 | 0.03 | 0  | 0  |
| 2 | 0.05 | 0.01 | 0  | 0  |
| 3 | 0.13 | 0.04 | 0  | 0  |
| w | 0.06 | 0.02 | 0  | 0  |

  

|   | HS+RT | sd   |
|---|-------|------|
| 1 | 0     | 0    |
| 2 | 0.2   | 0.1  |
| 3 | 0.1   | 0.06 |
| w | 0.1   | 0.06 |

  

|   | RCH+HS | sd   | RCH+HS | sd   |
|---|--------|------|--------|------|
| 1 | 0.15   | 0.06 | 0      | 0    |
| 2 | 0.07   | 0.02 | 0.1    | 0.06 |
| 3 | 0.16   | 0.03 | 0      | 0    |
| w | 0.19   | 0.06 | 0.1    | 0.06 |

  

|   | HS+RCH | sd   | HS+RCH | sd  |
|---|--------|------|--------|-----|
| 1 | 0.75   | 0.12 | 0      | 0   |
| 2 | 0.43   | 0.09 | 0.2    | 0.1 |
| 3 | 0.49   | 0.03 | 0      | 0   |
| w | 0.37   | 0.04 | 0      | 0   |

**Canton S: Effect of RCH, HS, and combination pretreatments on acute and chronic cold exposure**

| Stage | Canton S Acute |      | Canton S Chronic |      |
|-------|----------------|------|------------------|------|
|       | Control        | sd   | Control          | sd   |
| 1     | 0.10           | 0.08 | 0.20             | 0.06 |
| 2     | 0.02           | 0.00 | 0.10             | 0.00 |
| 3     | 0.22           | 0.05 | 0.10             | 0.06 |
| w     | 0.19           | 0.04 | 0.10             | 0.06 |

  

|   | RCH  | SD   | RCH  | sd   |
|---|------|------|------|------|
| 1 | 0.23 | 0.07 | 0.10 | 0.15 |
| 2 | 0.07 | 0.01 | 0.40 | 0.10 |
| 3 | 0.48 | 0.03 | 0.20 | 0.06 |
| w | 0.21 | 0.08 | 0.10 | 0.12 |

  

|   | HS   | sd   | HS   | sd |
|---|------|------|------|----|
| 1 | 0.12 | 0.06 |      |    |
| 2 | 0.09 | 0.03 | 0.10 |    |
| 3 | 0.36 | 0.09 | 0.00 |    |
| w | 0.29 | 0.07 |      |    |

  

|   | HS+RT | sd   |
|---|-------|------|
| 1 | 0.20  | 0.12 |
| 2 | 0.00  | 0.00 |
| 3 | 0.10  | 0.06 |
| w | 0.00  | 0.00 |

  

|   | RCH+HS | sd   | RCH+HS | sd   |
|---|--------|------|--------|------|
| 1 | 0.29   | 0.05 | 0.00   | 0.00 |
| 2 | 0.17   | 0.04 | 0.10   | 0.00 |
| 3 | 0.38   | 0.05 | 0.00   | 0.00 |
| w | 0.60   | 0.11 | 0.00   | 0.00 |

  

|   | HS+RCH | sd   | HS+RCH | sd   |
|---|--------|------|--------|------|
| 1 | 1.00   | 0.00 | 0.00   | 0.00 |
| 2 | 0.63   | 0.06 | 0.40   | 0.10 |
| 3 | 0.81   | 0.09 | 0.20   | 0.06 |
| w | 0.90   | 0.05 | 0.20   | 0.06 |



**W5N: Effect of RCH, HS, and combination pretreatments on acute and chronic cold exposure**

| Stage    | W5N Acute |      | W5N Chronic |      |
|----------|-----------|------|-------------|------|
|          | Control   | sd   | Control     | sd   |
| <b>1</b> | 0.08      | 0.04 | 0.10        | 0.06 |
| <b>2</b> | 0.03      | 0.00 | 0.10        | 0.06 |
| <b>3</b> | 0.08      | 0.03 | 0.10        | 0.06 |
| <b>w</b> | 0.13      | 0.05 | 0.10        | 0.00 |

  

| Stage    | RCH     |      | RCH     |      |
|----------|---------|------|---------|------|
|          | Control | sd   | Control | sd   |
| <b>1</b> | 0.20    | 0.07 | 0.10    | 0.10 |
| <b>2</b> | 0.20    | 0.03 | 0.10    | 0.06 |
| <b>3</b> | 0.27    | 0.07 | 0.10    | 0.15 |
| <b>w</b> | 0.20    | 0.10 | 0.10    | 0.06 |

  

| Stage    | HS      |      | HS      |      |
|----------|---------|------|---------|------|
|          | Control | sd   | Control | sd   |
| <b>1</b> | 0.02    | 0.01 | 0.00    | 0.00 |
| <b>2</b> | 0.00    | 0.00 | 0.00    | 0.00 |
| <b>3</b> | 0.10    | 0.03 | 0.10    | 0.06 |
| <b>w</b> | 0.08    | 0.02 | 0.00    | 0.00 |

  

| Stage    | RCH+HS  |      | RCH+HS  |      |
|----------|---------|------|---------|------|
|          | Control | sd   | Control | sd   |
| <b>1</b> | 0.18    | 0.06 | 0.10    | 0.06 |
| <b>2</b> | 0.08    | 0.03 | 0.00    | 0.00 |
| <b>3</b> | 0.10    | 0.03 | 0.00    | 0.00 |
| <b>w</b> | 0.12    | 0.02 | 0.10    | 0.06 |

  

| Stage    | HS+RCH  |      | HS+RCH  |      |
|----------|---------|------|---------|------|
|          | Control | sd   | Control | sd   |
| <b>1</b> | 0.51    | 0.17 | 0.10    | 0.10 |
| <b>2</b> | 0.47    | 0.05 | 0.40    | 0.06 |
| <b>3</b> | 0.50    | 0.10 | 0.20    | 0.10 |
| <b>w</b> | 0.74    | 0.01 | 0.00    | 0.00 |
